# Supplementary material
Source: PubMed Central journal article supplement (PMC6235690)

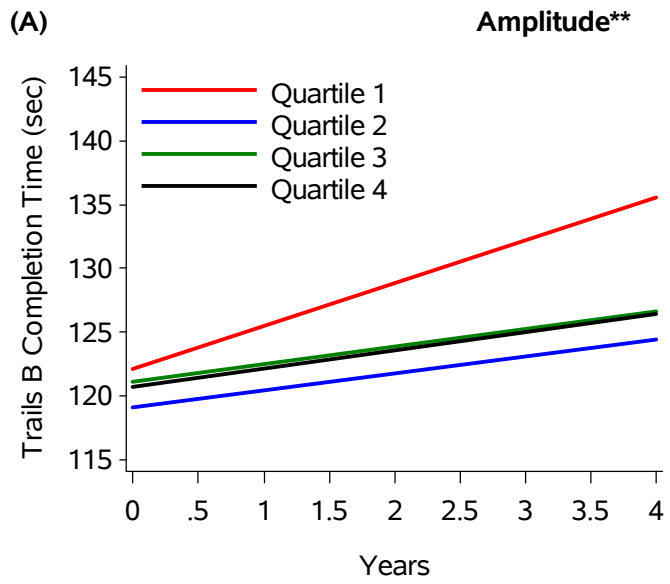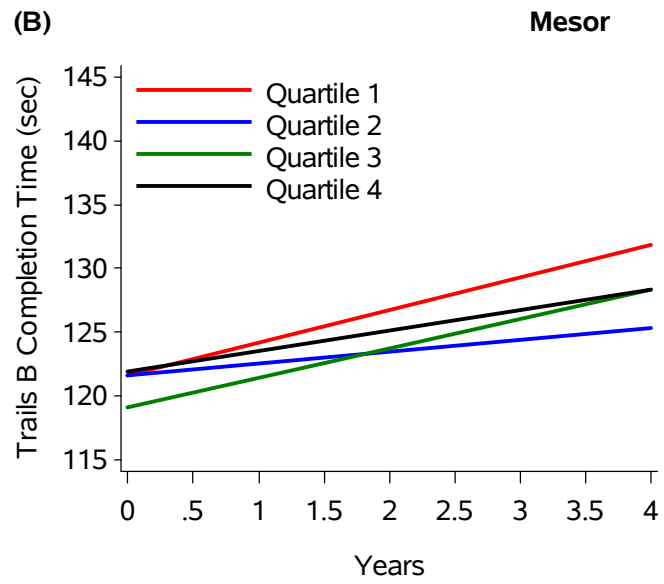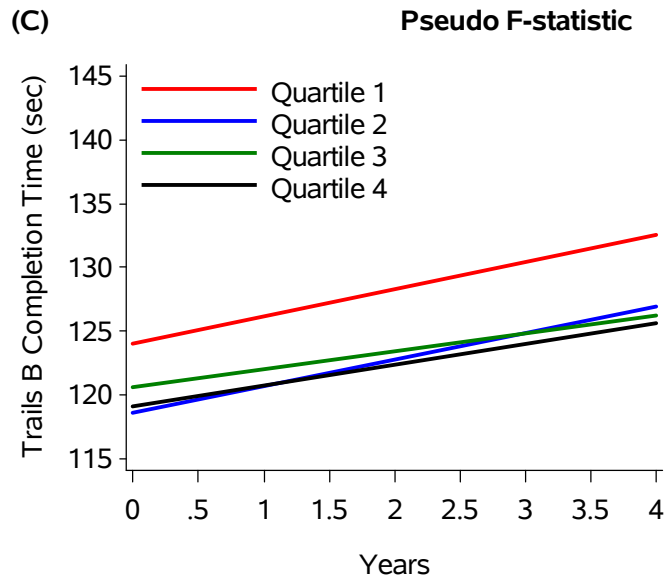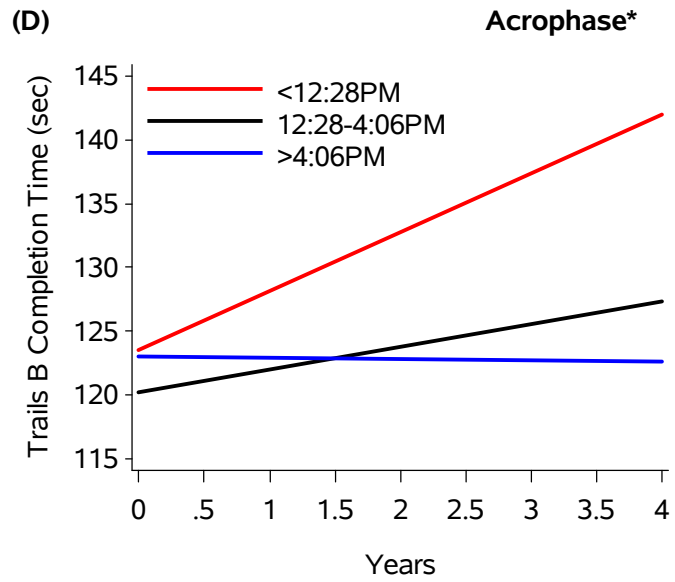

Supplement: NIHMS981546-supplement-Supp_FigS1.pdf [file NIHMS981546-supplement-Supp_FigS1.pdf]
